# Supplementary material for: Effects of supplementation levels of Allium fistulosum L. extract on in vitro ruminal fermentation characteristics and methane emission
Source: PeerJ. 2020 Aug 27;8:e9651. doi: 10.7717/peerj.9651 (PMC7456525; doi:10.7717/peerj.9651)
Supplement: Table S1 — xAllium fistulosum L. extract concentrations are based on quantity of timothy hay (300 mg) substrate. ySEM, standard error of the mean. zT: treatment; L: linear; Q: quadratic effect a–cMeans with different superscript letters in the same row indicate significant differences (P < 0.05). n = 3. [file peerj-08-9651-s002.docx]

| Incubation  time (h) | Extract concentrationx, % | | | | | | SEMy | *p*-valuez | | |
| --- | --- | --- | --- | --- | --- | --- | --- | --- | --- | --- |
| 0 | 1 | 3 | 5 | 7 | 9 | *T* | *L* | *Q* |
| *Ruminococcus albus* | | | | | | | | | | |
| 12 | 1.00 | 1.17 | 1.19 | 1.05 | 1.02 | 1.26 | 0.11 | 0.443 | 0.467 | 0.654 |
| 24 | 1.00b | 1.86a | 2.17a | 1.98a | 2.27a | 2.28a | 0.23 | 0.018 | 0.004 | 0.080 |
| *Fibrobacter succinogenes* | | | | | | | | | | |
| 12 | 1.00a | 0.64b | 0.67b | 0.63b | 0.66b | 0.68b | 0.07 | 0.015 | 0.028 | 0.018 |
| 24 | 1.00bc | 1.15abc | 0.95c | 1.22ab | 1.31a | 1.07abc | 0.08 | 0.046 | 0.129 | 0.227 |
| *Ruminococcus flavefaciens* | | | | | | | | | | |
| 12 | 1.00c | 1.15bc | 1.55a | 1.40ab | 0.94c | 1.41ab | 0.09 | 0.003 | 0.198 | 0.076 |
| 24 | 1.00b | 1.01b | 1.33ab | 1.05b | 1.45a | 1.25ab | 0.11 | 0.048 | 0.027 | 0.336 |
| Methanogenic archaea | | | | | | | | | | |
| 12 | 1.00a | 0.76b | 0.91ab | 0.91ab | 0.75b | 0.81b | 0.06 | 0.055 | 0.082 | 0.911 |
| 24 | 1.00a | 0.37c | 0.43bc | 0.32c | 0.42bc | 0.51b | 0.04 | <0.0001 | <0.0001 | <0.0001 |
| Ciliate-associated methanogens | | | | | | | | | | |
| 12 | 1.00b | 1.21ab | 0.98b | 1.62a | 0.74b | 0.96b | 0.14 | 0.015 | 0.355 | 0.086 |
| 24 | 1.00c | 1.27bc | 1.95a | 1.19bc | 1.48b | 1.30bc | 0.09 | 0.0002 | 0.178 | 0.001 |
